# Supplementary material for: Position correction in dust storm forecasting using LOTOS-EUROS v2.1: grid-distorted data assimilation v1.0
Source: Copernicus journal article supplement (doi:10.5194/gmd-14-5607-2021), 2021-09-10
Supplement: Supplementary file 1 [file gmd-14-5607-2021-supplement.pdf]

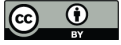

*Supplement of*

## **Position correction in dust storm forecasting using LOTOS-EUROS v2.1: grid-distorted data assimilation v1.0**

**Jianbing Jin et al.**

*Correspondence to:* Jianbing Jin ([jianbing.jin@nuist.edu.cn](mailto:jianbing.jin@nuist.edu.cn)) and Hong Liao ([hongliao@nuist.edu.cn](mailto:hongliao@nuist.edu.cn))

The copyright of individual parts of the supplement might differ from the article licence.

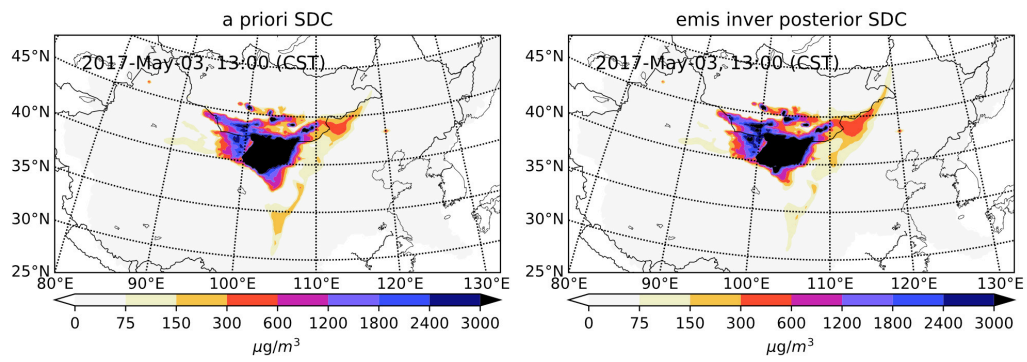

**Figure S1.** The *a priori* dust simulation (a) and *posterior* using the emission inversion at 15:00 May 03. SDC: surface dust concentration
